# Supplementary material for: Is nevirapine atropisomeric? Experimental and computational evidence for rapid conformational inversion
Source: Royal Society of Chemistry journal article supplement (doi:10.1039/c1ob06490h), 2011-11-22
Supplement: c1ob06490h.pdf [file c1ob06490h.pdf]

## Is nevirapine atropisomeric? Experimental and computational evidence for rapid conformational inversion

Edmund W. D. Burke, Gareth A. Morris, Mark A. Vincent, Ian H. Hillier and Jonathan Clayden\*

### SUPPORTING INFORMATION

Optimized structures (Å) of nevirapine with an explicit DMSO solvent molecule at the M06-2X/6-311G(2D,2P) level .

Minimum energy structure.

|    |   |   |           |           |          |
|----|---|---|-----------|-----------|----------|
| 1  | 6 | 0 | 2.547342  | -0.978103 | 3.729491 |
| 2  | 6 | 0 | 2.601787  | -2.370431 | 4.263474 |
| 3  | 6 | 0 | 3.077912  | -2.073382 | 2.865924 |
| 4  | 1 | 0 | 3.247133  | -0.255249 | 4.121617 |
| 5  | 1 | 0 | 3.332893  | -2.580841 | 5.028332 |
| 6  | 1 | 0 | 1.660669  | -2.889431 | 4.365836 |
| 7  | 1 | 0 | 2.449373  | -2.397774 | 2.050134 |
| 8  | 1 | 0 | 4.137802  | -2.080532 | 2.665506 |
| 9  | 7 | 0 | 1.239201  | -0.478654 | 3.384443 |
| 10 | 6 | 0 | 0.414285  | -0.112725 | 4.464329 |
| 11 | 6 | 0 | -0.976101 | 0.012040  | 4.312517 |
| 12 | 6 | 0 | -1.740333 | -0.374075 | 3.089838 |
| 13 | 7 | 0 | -1.175281 | -0.232765 | 1.865358 |
| 14 | 6 | 0 | -0.012716 | 0.474420  | 1.515844 |
| 15 | 6 | 0 | 1.186150  | 0.338103  | 2.224548 |
| 16 | 1 | 0 | -1.822850 | -0.483258 | 1.109967 |

|    |    |   |           |           |           |
|----|----|---|-----------|-----------|-----------|
| 17 | 8  | 0 | -2.875348 | -0.816608 | 3.202068  |
| 18 | 8  | 0 | -3.196182 | -0.989926 | 0.007416  |
| 19 | 16 | 0 | -4.040878 | -2.050283 | 0.673628  |
| 20 | 6  | 0 | -5.420815 | -1.163880 | 1.415615  |
| 21 | 1  | 0 | -6.184180 | -1.873359 | 1.728265  |
| 22 | 1  | 0 | -5.005943 | -0.641854 | 2.271716  |
| 23 | 1  | 0 | -5.800521 | -0.465856 | 0.672325  |
| 24 | 6  | 0 | -4.960270 | -2.782302 | -0.696794 |
| 25 | 1  | 0 | -5.720117 | -3.459125 | -0.312227 |
| 26 | 1  | 0 | -4.241245 | -3.327533 | -1.301736 |
| 27 | 1  | 0 | -5.399051 | -1.972557 | -1.275680 |
| 28 | 6  | 0 | -0.026515 | 1.273803  | 0.371700  |
| 29 | 6  | 0 | -1.283610 | 1.446996  | -0.430387 |
| 30 | 1  | 0 | -1.574134 | 0.517420  | -0.921763 |
| 31 | 1  | 0 | -1.146560 | 2.214156  | -1.188781 |
| 32 | 1  | 0 | -2.121727 | 1.723640  | 0.209734  |
| 33 | 6  | 0 | 1.167834  | 1.873383  | -0.010105 |
| 34 | 1  | 0 | 1.205070  | 2.495773  | -0.893365 |
| 35 | 6  | 0 | 2.304338  | 1.659891  | 0.745531  |
| 36 | 1  | 0 | 3.250919  | 2.102646  | 0.460096  |
| 37 | 7  | 0 | 2.314565  | 0.917927  | 1.849410  |
| 38 | 7  | 0 | 1.015727  | 0.052613  | 5.638701  |
| 39 | 6  | 0 | 0.276904  | 0.386223  | 6.691402  |
| 40 | 6  | 0 | -1.094521 | 0.575834  | 6.641563  |
| 41 | 6  | 0 | -1.722814 | 0.358304  | 5.429001  |

|    |   |   |           |          |          |
|----|---|---|-----------|----------|----------|
| 42 | 1 | 0 | -2.797187 | 0.414680 | 5.324086 |
| 43 | 1 | 0 | -1.647685 | 0.851273 | 7.526650 |
| 44 | 1 | 0 | 0.815779  | 0.507873 | 7.624129 |

Transition structure.

|    |   |   |           |           |           |
|----|---|---|-----------|-----------|-----------|
| 1  | 6 | 0 | 0.286138  | -0.299740 | -0.141149 |
| 2  | 6 | 0 | 0.121994  | -0.245330 | 1.249007  |
| 3  | 6 | 0 | 1.240291  | 0.061059  | 2.048630  |
| 4  | 7 | 0 | 2.376343  | 0.445791  | 1.483085  |
| 5  | 6 | 0 | 2.507467  | 0.467209  | 0.166461  |
| 6  | 6 | 0 | 1.506651  | 0.063088  | -0.689800 |
| 7  | 7 | 0 | -1.189987 | -0.416157 | 1.720838  |
| 8  | 6 | 0 | -1.612180 | -1.229214 | 2.718909  |
| 9  | 8 | 0 | -2.752478 | -1.669180 | 2.707661  |
| 10 | 7 | 0 | 1.271490  | 0.015795  | 3.470990  |
| 11 | 6 | 0 | 2.371248  | 0.715359  | 4.127928  |
| 12 | 6 | 0 | 3.241316  | 0.032424  | 5.139076  |
| 13 | 6 | 0 | 3.809485  | 0.419727  | 3.819306  |
| 14 | 6 | 0 | -0.852698 | -0.712337 | -1.031644 |
| 15 | 6 | 0 | -0.738417 | -1.447434 | 3.903039  |
| 16 | 6 | 0 | -1.287260 | -2.305953 | 4.850370  |
| 17 | 6 | 0 | -0.854059 | -2.311826 | 6.159959  |
| 18 | 6 | 0 | 0.046663  | -1.315008 | 6.495164  |
| 19 | 7 | 0 | 0.628874  | -0.526475 | 5.608163  |

|    |    |   |           |           |           |
|----|----|---|-----------|-----------|-----------|
| 20 | 6  | 0 | 0.369125  | -0.653520 | 4.302539  |
| 21 | 1  | 0 | 0.308458  | -1.126429 | 7.530884  |
| 22 | 1  | 0 | -1.268084 | -2.976627 | 6.901906  |
| 23 | 1  | 0 | -2.120814 | -2.914617 | 4.531038  |
| 24 | 1  | 0 | -0.491341 | -0.869240 | -2.045173 |
| 25 | 1  | 0 | -1.644963 | 0.036514  | -1.055427 |
| 26 | 1  | 0 | -1.310912 | -1.634974 | -0.672961 |
| 27 | 1  | 0 | 1.656619  | 0.049245  | -1.759829 |
| 28 | 1  | 0 | 3.460476  | 0.819822  | -0.210425 |
| 29 | 1  | 0 | -1.949354 | -0.197620 | 1.070725  |
| 30 | 1  | 0 | 3.066104  | -1.018745 | 5.300776  |
| 31 | 1  | 0 | 3.476291  | 0.591625  | 6.031853  |
| 32 | 1  | 0 | 4.468470  | 1.270511  | 3.732645  |
| 33 | 1  | 0 | 4.004967  | -0.373654 | 3.119395  |
| 34 | 1  | 0 | 2.134879  | 1.750161  | 4.338009  |
| 35 | 8  | 0 | -3.609534 | 0.194590  | 0.292321  |
| 36 | 16 | 0 | -4.676810 | -0.840294 | 0.552141  |
| 37 | 6  | 0 | -5.466700 | -0.340428 | 2.093431  |
| 38 | 1  | 0 | -4.767115 | -0.590077 | 2.884515  |
| 39 | 1  | 0 | -5.631782 | 0.733592  | 2.036927  |
| 40 | 1  | 0 | -6.400923 | -0.884423 | 2.215983  |
| 41 | 6  | 0 | -6.022787 | -0.340651 | -0.545020 |
| 42 | 1  | 0 | -6.916597 | -0.919571 | -0.322762 |
| 43 | 1  | 0 | -5.690742 | -0.534461 | -1.561186 |
| 44 | 1  | 0 | -6.188679 | 0.724983  | -0.402981 |
